# Supplementary material
Source: publisher figshare collection journal article supplement (https://rs.figshare.com/ndownloader/files/13261973)
Supplement: Supplementary file 1 [file 13261973]

## Supplementary material

**Table S1.** Additional information about the skeletal samples, including the institution in which the remains are curated.

| Population | Details                                                                                                                                                                                                                                                                                                                                                                                                                                                           | Institution <sup>a</sup> |
|------------|-------------------------------------------------------------------------------------------------------------------------------------------------------------------------------------------------------------------------------------------------------------------------------------------------------------------------------------------------------------------------------------------------------------------------------------------------------------------|--------------------------|
| Ainu       | Recent, probably 18 <sup>th</sup> -19 <sup>th</sup> century AD                                                                                                                                                                                                                                                                                                                                                                                                    | KU, TU                   |
| Alaska     | The Tigara burials represent protohistoric/historic whale hunters (circa 13 <sup>th</sup> -18 <sup>th</sup> century AD). The Ipiutak people (circa 4 <sup>th</sup> -9 <sup>th</sup> century AD) appear to have been caribou hunters.                                                                                                                                                                                                                              | AMNH                     |
| Arikara    | Larson Site, South Dakota (1,675-1,780 AD).                                                                                                                                                                                                                                                                                                                                                                                                                       | UTK                      |
| Austria    | Early 20 <sup>th</sup> century AD immigrants to the USA from Bohemia (CMNH) and Austrian remains from the 19 <sup>th</sup> century AD (NM).                                                                                                                                                                                                                                                                                                                       | CMNH, NM                 |
| Botswana   | Tswana remains of cadaveric origin, Raymond Dart collection, 19 <sup>th</sup> century AD.                                                                                                                                                                                                                                                                                                                                                                         | UW                       |
| California | Native Californians from two prehistoric sites: Ala-329 and CC-138. CCo-138, also called Hotchkiss site, is located 3 miles from the town of Oakley. The burials date from the Late Period (1,500-1,750 AD). The Ala-329 site, also called Ryan Mound site, is located in Alameda County on the southeastern side of the San Francisco Bay. It dates to the Middle and Late Periods (500-1,750 AD), but the large majority of the remains date to after 1,000 AD. | UCB                      |
| Egypt      | The sample includes the El Hesa material (American Museum of Natural History), dated to the 4 <sup>th</sup> -7 <sup>th</sup> century AD, and the undated El Gizeh material (Naturhistorisches Museum, Wien).                                                                                                                                                                                                                                                      | AMNH, NM                 |
| France     | French remains of cadaveric origin, 20 <sup>th</sup> century AD, mostly middle age or older.                                                                                                                                                                                                                                                                                                                                                                      | MdH                      |
| Fuegian    | Mostly undated remains, but likely all from the 19 <sup>th</sup> century AD.                                                                                                                                                                                                                                                                                                                                                                                      | MNdAE, UR                |
| India      | Probably recent, 19 <sup>th</sup> -20 <sup>th</sup> century AD; they were bought by the Museum of Man from a provider of human remains for anatomical collections.                                                                                                                                                                                                                                                                                                | MoM                      |
| Iran       | Hasan-lu site, 9 <sup>th</sup> century BC.                                                                                                                                                                                                                                                                                                                                                                                                                        | UP                       |
| Italy      | Early 20 <sup>th</sup> century AD immigrants to the USA from Italy (CMNH), and recent Italian remains (prob. 19 <sup>th</sup> century AD) from an Italian anatomical collection (MNdAE).                                                                                                                                                                                                                                                                          | CMNH, MNdAE              |
| Japan      | Recent Japanese, probably all 20 <sup>th</sup> century AD.                                                                                                                                                                                                                                                                                                                                                                                                        | KU, MdH                  |
| Kenya      | Kykuyu remains from the 20 <sup>th</sup> century AD.                                                                                                                                                                                                                                                                                                                                                                                                              | NMK                      |
| KhoeSan    | Human remains spanning a wide period of time, from relatively recent (19 <sup>th</sup> -20 <sup>th</sup> century AD) to the first centuries BC. Mostly undated.                                                                                                                                                                                                                                                                                                   | MGM, NHM, UW             |

|             |                                                                                                                                          |            |
|-------------|------------------------------------------------------------------------------------------------------------------------------------------|------------|
| Lesotho     | Sotho remains of cadaveric origin, Raymond Dart collection, 19 <sup>th</sup> century AD.                                                 | UW         |
| Nubia       | Necropolis of Sayala, 3 <sup>rd</sup> -4 <sup>th</sup> century AD.                                                                       | NM         |
| Patagonia   | Mostly undated remains, but likely from the 19 <sup>th</sup> century AD.                                                                 | MdH, MNdAE |
| Peru        | Undated pre-Columbian remains from the ancient necropolis of Ancon.                                                                      | MdH        |
| Philippines | Undated, but probably all recent (18 <sup>th</sup> -19 <sup>th</sup> century AD). Coded as “negritos” or Aeta in the museum’s catalogue. | MdH        |
| Portugal    | Recent remains (19 <sup>th</sup> century and early 20 <sup>th</sup> century AD) from the Cemitério da Conchada in Coimbra.               | CU         |
| Sadlermiut  | Sadlermiut remains from Native Point and Prairie Point, probably 16 <sup>th</sup> -19 <sup>th</sup> century AD.                          | MCC        |
| Swaziland   | Swazi remains of cadaveric origin, Raymond Dart collection, 19 <sup>th</sup> century AD.                                                 | UW         |
| Thailand    | Modern remains of cadaveric origin (20 <sup>th</sup> and 21 <sup>st</sup> century AD).                                                   | CMU, MdH   |

<sup>a</sup>(AMNH = American Museum of Natural History, New York, USA; CMNH = Cleveland Museum of Natural History, Ohio, USA; CMU = Chiang Mai University, Thailand; CU = Coimbra University, Portugal; KU = Kyoto University, Japan; MCC = Musée Canadien des Civilisations, Gatineau, Canada; MdH = Musée de l’Homme, Paris, France; MGM = McGregor Museum, Kimberley, South Africa; MNdAE = Museo Nazionale di Antropologia e Etnologia, Firenze, Italy; MoM = San Diego Museum of Man, California, USA; NHM = Natural History Museum, London, UK; NM = Naturhistorisches Museum, Wien, Austria; NMK = National Museum of Kenya, Nairobi, Kenya; TU = Tokyo University, Japan; UCB = University of California at Berkeley, USA; UP = University of Pennsylvania at Philadelphia, USA; UR = University of Rome “La Sapienza”, Italy; UTK = University of Tennessee at Knoxville, USA; UW = University of Witwatersrand, Johannesburg, South Africa).

**Table S2.** Coordinates and climatic data for the populations under study.

| <b>Population</b> | <b>Longitude</b> | <b>Latitude</b> | <b>Min. temperature (°C)</b> | <b>Max. temperature (°C)</b> |
|-------------------|------------------|-----------------|------------------------------|------------------------------|
| Ainu              | 142.70           | 43.33           | -16.5                        | 20.7                         |
| Alaska            | -166.80          | 68.33           | -26.7                        | 10.3                         |
| Arikara           | -100.07          | 43.95           | -15.0                        | 32.4                         |
| Austria           | 14.55            | 47.52           | -10.1                        | 17.0                         |
| Botswana          | 23.92            | -22.05          | 5.0                          | 33.2                         |
| California        | -122.00          | 38.20           | 3.1                          | 30.0                         |
| Egypt             | 31.22            | 30.03           | 6.9                          | 34.9                         |
| France            | 2.35             | 48.85           | 0.8                          | 24.8                         |
| Fuegian           | -71.28           | -53.50          | -2.6                         | 12.2                         |
| India             | 88.45            | 22.58           | 12.6                         | 35.9                         |
| Iran              | 51.42            | 35.67           | -5.0                         | 36.0                         |
| Italy             | 12.42            | 41.88           | 3.8                          | 30.0                         |
| Japan             | 138.25           | 36.20           | -7.9                         | 28.1                         |
| Kenya             | 38.00            | 1.00            | 15.6                         | 33.9                         |
| KhoeSan           | 21.00            | -25.00          | 1.5                          | 34.9                         |
| Lesotho           | 28.23            | -29.62          | -2.7                         | 23.7                         |
| Nubia             | 30.22            | 12.85           | 14.0                         | 38.7                         |
| Patagonia         | -69.00           | -41.75          | -6.2                         | 22.6                         |
| Peru              | -74.62           | -12.77          | -1.5                         | 18.4                         |
| Philippines       | 121.77           | 12.87           | 22.6                         | 32.6                         |
| Portugal          | -8.43            | 40.22           | 5.1                          | 28.1                         |
| Sadlermiut        | -84.67           | 64.00           | -34.5                        | 13.8                         |
| Swaziland         | 31.47            | -26.52          | 8.1                          | 29.3                         |
| Thailand          | 99.00            | 18.78           | 12.8                         | 36.0                         |

**Table S3.** Matching skeletal and genetic samples. Number of individuals of the genetic sample is also reported.

| <b>Skeletal samples</b> | <b>Genetic samples</b>                                                  | <b>N</b> |
|-------------------------|-------------------------------------------------------------------------|----------|
| Alaska                  | Chukchi, Naukan, Koryak from Russia                                     | 42       |
| Arikara                 | Algonquin from Canada                                                   | 9        |
| Austria                 | Hungarian                                                               | 10       |
| Botswana                | Tswana + South African Tswana                                           | 7        |
| California              | Pima from Mexico                                                        | 14       |
| Egypt                   | Egypt                                                                   | 18       |
| France                  | France + South France                                                   | 32       |
| Fuegians + Patagonia    | Chilote                                                                 | 4        |
| India                   | Gujarati (A, B, C, D), Kharia, Lodhi, Mala, Onge, Tiwari, Vishwabrahmin | 97       |
| Iran                    | Iran                                                                    | 8        |
| Italy                   | Italians from East and West Sicily, Bergamo and Tuscany                 | 31       |
| Japan                   | Japanese                                                                | 29       |
| Kenya                   | Kikuyu                                                                  | 4        |
| KhoeSan                 | Nama and Xuun                                                           | 29       |
| Portugal                | Spanish from Andalucia, Extremadura, Galicia                            | 14       |
| Sadlermiut              | Chukchi, Naukan, Koryak from Russia                                     | 42       |
| Thailand                | Thai                                                                    | 10       |

**Table S4.** Significance of post-hoc Tukey tests comparing canal shape in different geographic regions. Significant results in bold.

| <b>INLET</b>          | Americas         | Asia         | Europe & North Africa |
|-----------------------|------------------|--------------|-----------------------|
| Asia                  | <b>&lt;0.001</b> |              |                       |
| Europe & North Africa | <b>0.003</b>     | <b>0.011</b> |                       |
| Sub-Saharan Africa    | <b>&lt;0.001</b> | 0.465        | <b>&lt;0.001</b>      |
| <b>MIDPLANE</b>       | Americas         | Asia         | Europe & North Africa |
| Asia                  | <b>&lt;0.001</b> |              |                       |
| Europe & North Africa | 0.751            | <b>0.023</b> |                       |
| Sub-Saharan Africa    | <b>&lt;0.001</b> | 0.980        | <b>0.005</b>          |
| <b>OUTLET</b>         | Americas         | Asia         | Europe & North Africa |
| Asia                  | <b>&lt;0.001</b> |              |                       |
| Europe & North Africa | 0.970            | <b>0.003</b> |                       |
| Sub-Saharan Africa    | <b>&lt;0.001</b> | 0.076        | <b>&lt;0.001</b>      |

**Table S5.** Coefficient of variation (CV) of the three birth canal indices and raw diameters, compared with indices and raw measurements from other anatomical regions calculated from the Goldman dataset (<http://web.utk.edu/~auerbach/GOLD.htm>; [2]). Only female individuals were included in the analyses.

| <b>Indices</b>          | <b>CV</b> | <b>Indices</b>                  | <b>CV</b> |
|-------------------------|-----------|---------------------------------|-----------|
| Inlet                   | 9.936     | Brachial index                  | 4.392     |
| Midplane                | 9.884     | Crural index                    | 3.215     |
| Outlet                  | 11.767    | Pelvic breadth / femoral length | 6.707     |
| <b>Raw measurements</b> | <b>CV</b> | <b>Raw measurements</b>         | <b>CV</b> |
| Inlet AP                | 8.362     | Humerus max length              | 5.753     |
| Inlet ML                | 7.753     | Radius max length               | 6.447     |
| MidplaneAP              | 7.166     | Femur max length                | 5.688     |
| Midplane ML             | 9.156     | Tibia max length                | 6.727     |
| Outlet AP               | 7.817     | Bi-iliac breadth                | 6.669     |
| Outlet ML               | 10.261    |                                 |           |

**Table S6.** Results of the Mantel tests between population canal shape differences (Q) and climatic distances (Tmin.d and Tmax.d, respectively distance matrices based on minimum temperature and maximum temperature). The values obtained after correcting for genetic distance (G) are also reported. The reduced dataset for which genetic data were available was used for these analyses.

| <b>Model</b>    | <b>R<sup>2</sup></b> | <b>P-value</b> |
|-----------------|----------------------|----------------|
| Q VS Tmin.d     | 0.045                | 0.095          |
| Q VS Tmax.d     | 0.020                | 0.136          |
| Q VS Tmin.d / G | 0.019                | 0.168          |
| Q VS Tmax.d / G | 0.016                | 0.153          |

**Table S7.** Results of the Mantel tests between population differences in canal indices and climatic distances (Tmin.d and Tmax.d, respectively distance matrices based on minimum temperature and maximum temperature). The values obtained after correcting for genetic distance (G) are also reported. The reduced dataset for which genetic data were available was used for these analyses. Significant results in bold.

| Model              | R <sup>2</sup> | P-value      | Model                  | R <sup>2</sup> | P-value      |
|--------------------|----------------|--------------|------------------------|----------------|--------------|
| Inlet VS Tmin.d    | 0.153          | <b>0.002</b> | Inlet VS Tmin.d / G    | 0.124          | <b>0.006</b> |
| Inlet VS Tmax.d    | 0.063          | <b>0.024</b> | Inlet VS Tmax.d / G    | 0.061          | <b>0.026</b> |
| Midplane VS Tmin.d | 0.031          | 0.099        | Midplane VS Tmin.d / G | 0.029          | 0.113        |
| Midplane VS Tmax.d | 0.003          | 0.279        | Midplane VS Tmax.d / G | 0.003          | 0.292        |
| Outlet VS Tmin.d   | <0.001         | 0.405        | Outlet VS Tmin.d / G   | 0.007          | 0.702        |
| Outlet VS Tmax.d   | 0.001          | 0.348        | Outlet VS Tmax.d / G   | <0.001         | 0.435        |

**Table S8.** Estimation of the inlet, midplane and outlet indices in extinct hominin fossils (suggested to be females) of the Homo and Australopithecus genera, and modern human range of variation estimated from this study. The data are drawn from published studies, and some refer to alternative reconstructions of the same fossil.

| Species                    | Fossil    | Reference  | Inlet (AP/ML) | Midplane (AP/ML) | Outlet (AP/ML) |
|----------------------------|-----------|------------|---------------|------------------|----------------|
| <i>H. sapiens</i>          |           | This study | 0.63-1.17     | 0.97-1.63        | 0.74-1.47      |
| <i>H. neanderthalensis</i> | Tabun C1  | [3]        | 0.75-0.85     | 1.07-1.24        | 0.98-1.16      |
| <i>H. neanderthalensis</i> | Tabun C1  | [4]        | 0.79          |                  | 0.70           |
| <i>H. heidelbergensis?</i> | SH1       | [5]        | 0.79          | 1.23             | 0.94           |
| <i>H. heidelbergensis?</i> | SH1       | [6]        | 0.78          | 1.09             | 0.95           |
| <i>H. erectus?</i>         | BSN49/P27 | [7]        | 0.79          | 0.97             |                |
| <i>A. sediba</i>           | MH2       | [8]        | 0.69          |                  |                |
| <i>A. africanus</i>        | Sts 14    | [9]        | 0.88          | 0.97             | 0.79           |
| <i>A. africanus</i>        | Sts 14    | [10]       | 0.71          | 0.79             |                |
| <i>A. africanus</i>        | Sts 65    | [11]       | 0.82          |                  |                |
| <i>A. afarensis</i>        | AL 288-1  | [12]       | 0.62          | 0.91             | 1.01           |
| <i>A. afarensis</i>        | AL 288-1  | [13]       | 0.58          | 0.71             | 0.74           |
| <i>A. afarensis</i>        | AL 288-1  | [9]        | 0.66          | 1.09             | 1.11           |

## References

- 1 Kurki, H. K. Protection of obstetric dimensions in a small-bodied human sample. *American Journal of Physical Anthropology* **133**, 1152-1165 (2007).
- 2 Auerbach, B. M. & Ruff, C. B. Limb bone bilateral asymmetry: variability and commonality among modern humans. *J. Hum. Evol.* **50**, 203-218 (2006).
- 3 Ponce de León, M. S. *et al.* Neanderthal brain size at birth provides insights into the evolution of human life history. *Proc. Natl Acad. Sci. USA* **105**, 13764-13768 (2008).

- 4 Weaver, T. D. & Hublin, J. J. Neandertal birth canal shape and the evolution of human childbirth. *Proc. Natl Acad. Sci. USA* **106**, 8151-8156 (2009).
- 5 Arsuaga, J.-L. *et al.* A complete human pelvis from the Middle Pleistocene of Spain. *Nature* **399**, 255-258 (1999).
- 6 Bonmatí, A. *et al.* Middle Pleistocene lower back and pelvis from an aged human individual from the Sima de los Huesos site, Spain. *Proc. Natl Acad. Sci. USA* **107**, 18386-183 (2010).
- 7 Simpson, S. W. *et al.* A female *Homo erectus* pelvis from Gona, Ethiopia. *Science* **322**, 1089-1092 (2008).
- 8 Kibii, J. M. *et al.* A partial pelvis of *Australopithecus sediba*. *Science* **333**, 1407-1411 (2011).
- 9 Häusler, M. & Schmid, P. Comparison of the pelvises of Sts 14 and AL288-1: implications for birth and sexual dimorphism in australopithecines. *J. Hum. Evol.* **29**, 363-383 (1995).
- 10 Berge, C. & Goullaras, D. A new reconstruction of Sts 14 pelvis (*Australopithecus africanus*) from computed tomography and three-dimensional modeling techniques. *J. Hum. Evol.* **58**, 262-272 (2010).
- 11 Claxton, A. G., Hammond, A. S., Romano, J., Oleinik, E. & DeSilva, J. M. Virtual reconstruction of the *Australopithecus africanus* pelvis Sts 65 with implications for obstetrics and locomotion. *J. Hum. Evol.* **99**, 10-24 (2016).
- 12 Schmid, P. Eine Rekonstruktion des Skelettes von A.L. 288-1 (Hadar) und deren Konsequenzen. *Folia Primatol.* **40**, 283-306 (1983).
- 13 Tague, R. G. & Lovejoy, C. O. The obstetric pelvis of A.L. 288-1 (Lucy). *J. Hum. Evol.* **15**, 237-255 (1986).

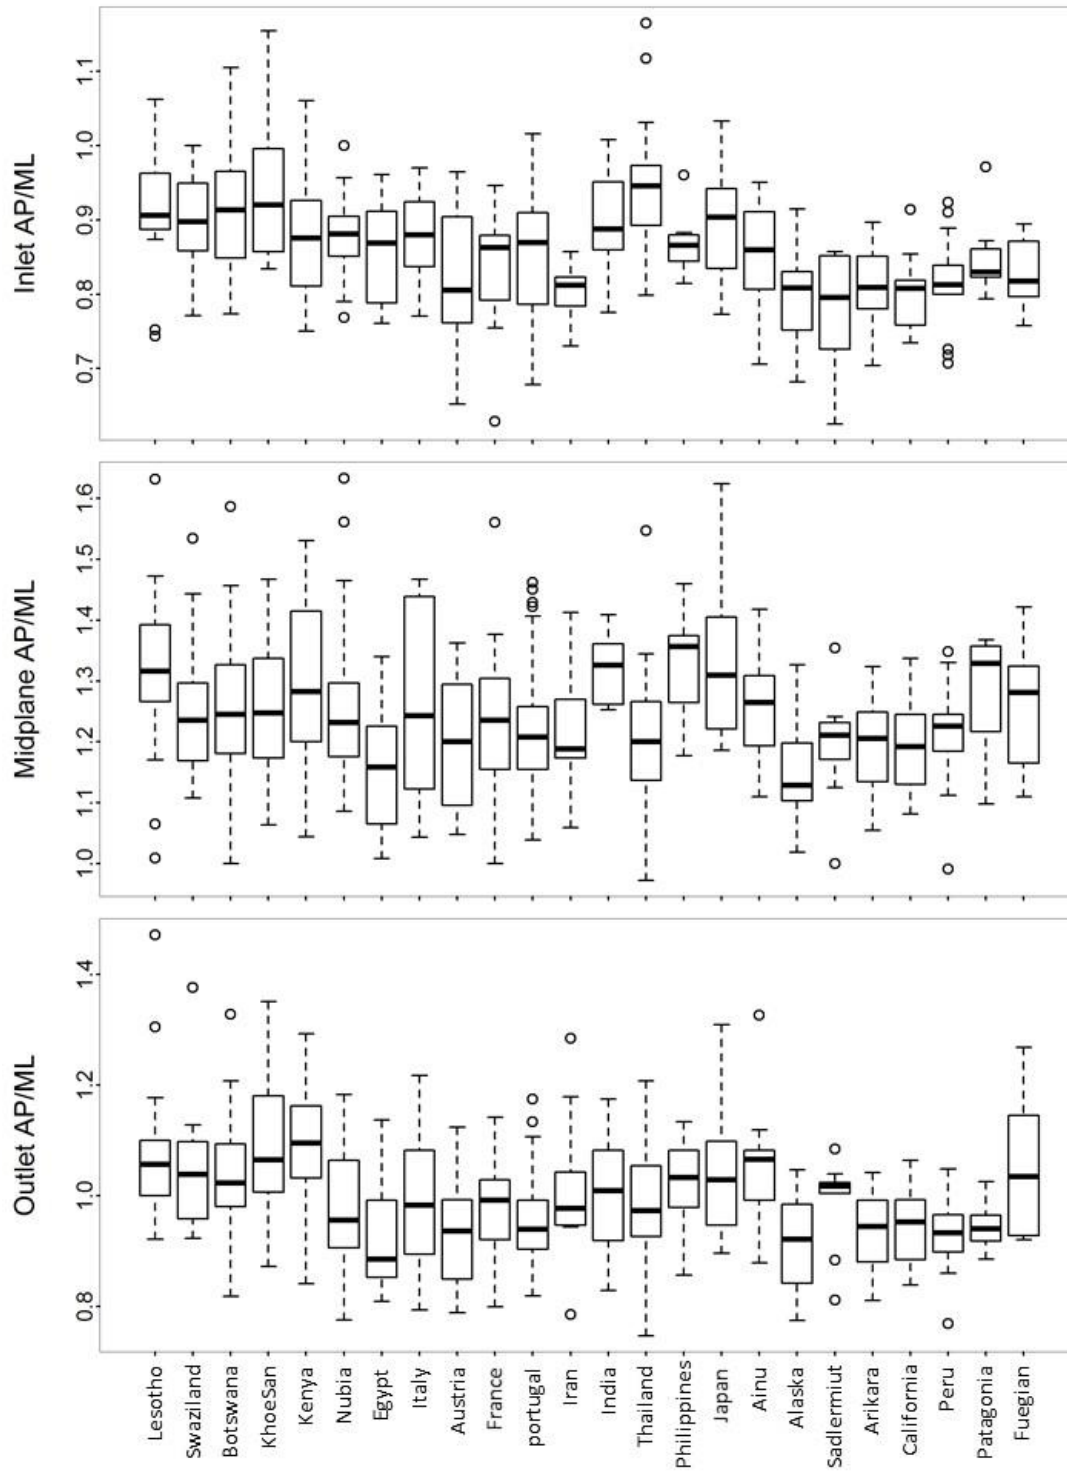

**Figure S1:** Variation in the inlet, midplane and outlet indices in the studied populations, arranged by increasing distance from central sub-Saharan Africa (from left to right). The boxes represent the interquartile distance, the whiskers extend to the most extreme data point which is no more than 1.5 times the interquartile range, and outliers are highlighted as open circles.



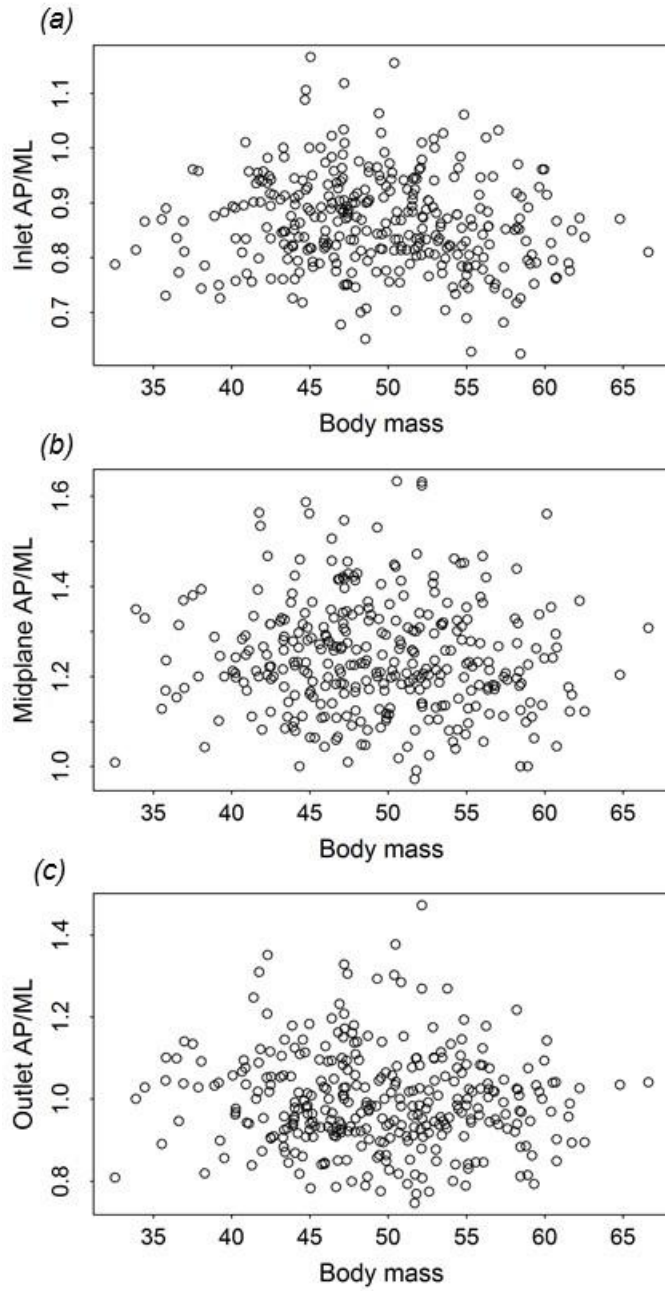

**Figure S2.** Plots of individual canal indices against body size: (a) inlet; (b) midplane; (c) outlet.
